# Supplementary material for: Pressure-induced polymerization of 1,4-difluorobenzene towards fluorinated diamond nanothreads
Source: Royal Society of Chemistry journal article supplement (doi:10.1039/d4cp03751k), 2024-12-06
Supplement: d4cp03751k1.pdf [file d4cp03751k1.pdf]

## Supporting Information

Pressure-induced polymerization of 1,4-difluorobenzene towards fluorinated diamond nanothreads

Guangwei Che,<sup>a</sup> Yunfan Fei,<sup>a</sup> Xingyu Tang,<sup>a</sup> Zilin Zhao,<sup>a</sup> Takanori Hattori,<sup>b</sup> Jun Abe,<sup>c</sup> Xiaoge Wang,<sup>d</sup> Jing Ju,<sup>d</sup> Xiao Dong,<sup>e</sup> Yajie Wang,<sup>\*a</sup> Kuo Li,<sup>a</sup> and Haiyan Zheng<sup>\*a</sup>

<sup>a</sup> Center for High Pressure Science and Technology Advanced Research, Beijing 100193, P. R. China

<sup>b</sup> J-PARC Center, Japan Atomic Energy Agency, Tokai, Ibaraki 319-1195, Japan.

<sup>c</sup> Neutron Science and Technology Center, Comprehensive Research Organization for Science and Society, Tokai, Ibaraki 319-1106, Japan.

<sup>d</sup> College of Chemistry and Molecular Engineering, Peking University, Beijing 100871, P. R. China

<sup>e</sup> Key Laboratory of Weak-Light Nonlinear Photonics, School of Physics, Nankai University, Tianjin 300071, P. R. China

Email: yajie.wang@hpstar.ac.cn; [zhenghy@hpstar.ac.cn](mailto:zhenghy@hpstar.ac.cn)

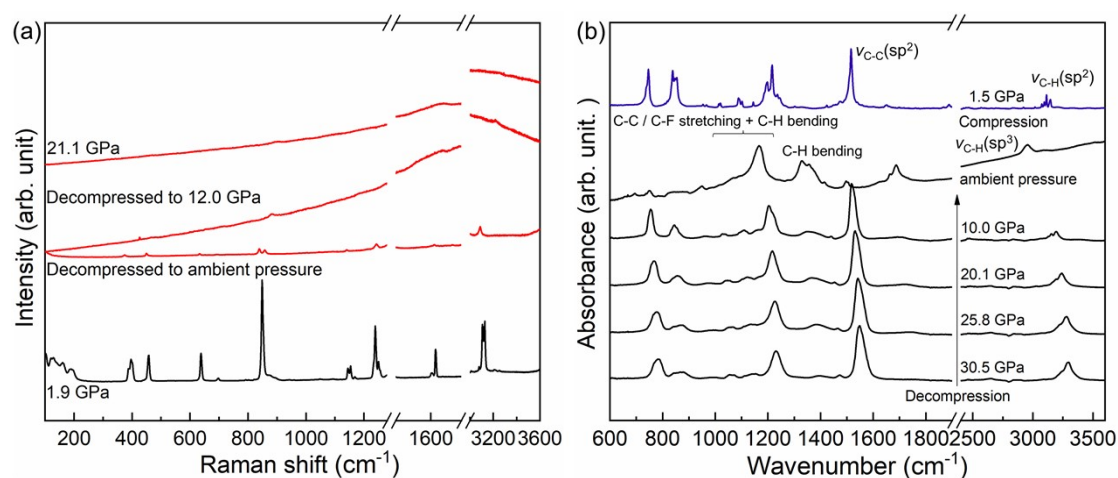

**Fig. S1** (a) Raman spectra of 1,4-DFB upon decompression. (b) IR spectra of 1,4-DFB upon decompression.

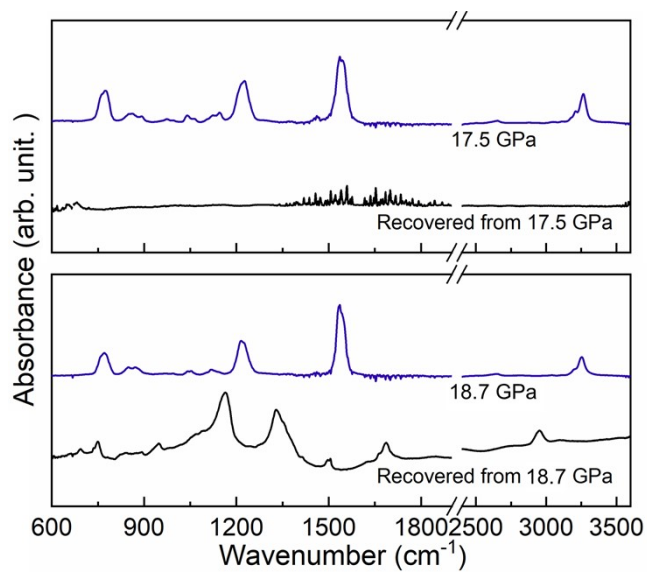

**Fig. S2** IR spectra of samples recovered from 17.5 and 18.7 GPa. At ambient pressure, the raw material (1,4-DFB) was volatilized.

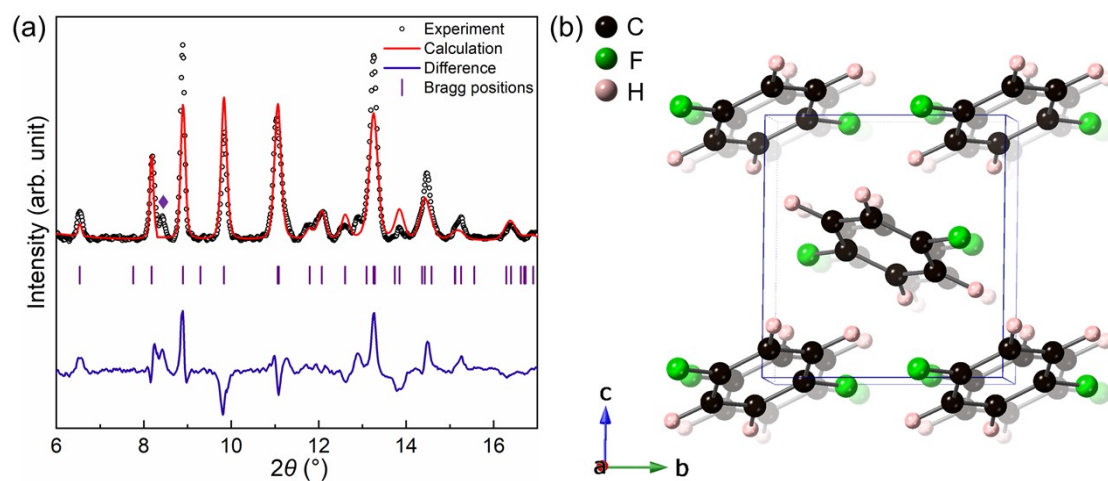

**Fig. S3** (a) Rietveld refinement plot of 1,4-DFB at 4.3 GPa with  $R_{wp}$  at 13.49 %. To construct the complete 1,4-DFB molecule as a rigid body, we changed the space group to  $P2_1$  during the refinement process. The peak marked with purple diamond originates from an unknown impurity. (b) Structure of 1,4-DFB along the  $[100]$  axis at 4.3 GPa and room temperature.

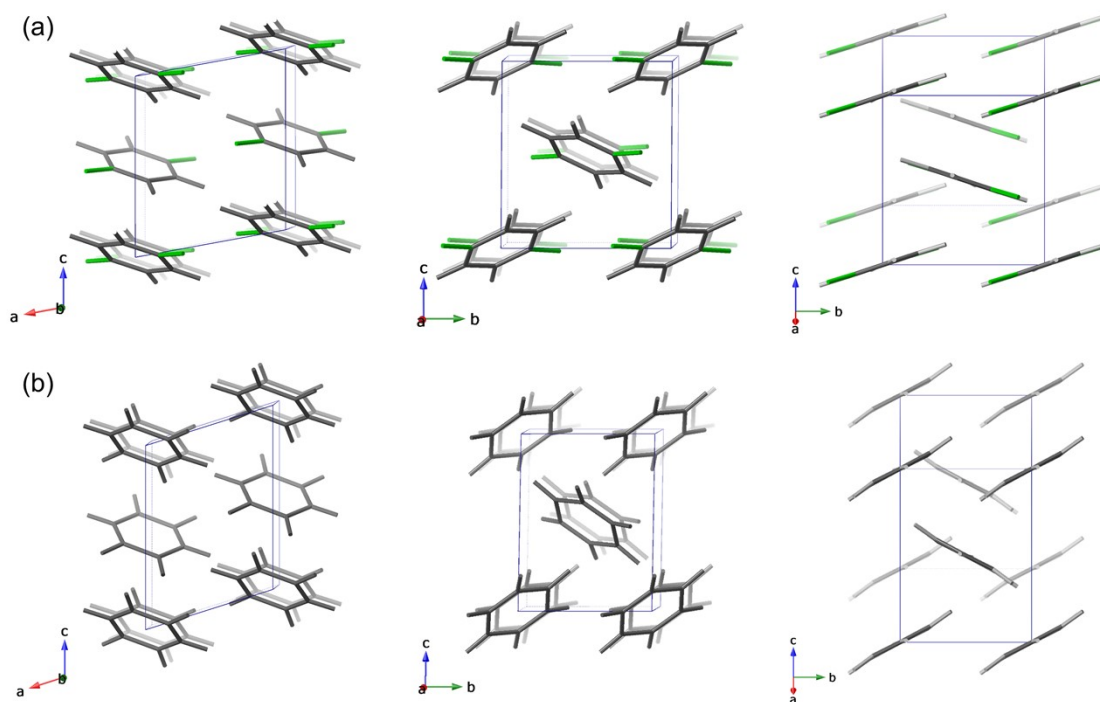

**Fig. S4** (a) Crystal structures of 1,4-DFB at 9.4 GPa along the [010], [100] and [803] axes, respectively. (b) Crystal structures of  $d_6$ -benzene at 9.2 GPa along the [010], [100] and [803] axes, respectively.

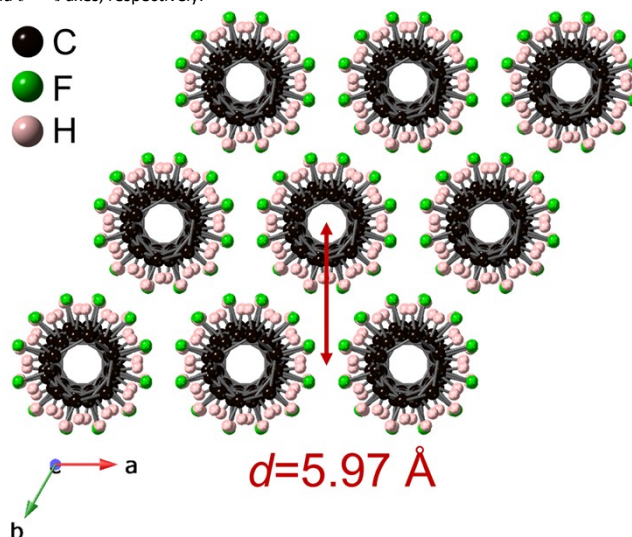

**Fig. S5** A schematic diagram of the proposed packing of product, including a hypothetical intrathread structure (polytwistane model, based on the benzene-derived DNTh model by X. Li et al.<sup>1</sup>) for simulating the shape of the thread. After theoretical optimization, the  $d$ -spacing (the interplanar distance between the layers formed by DNThs) is 5.97 Å, which shows good agreement with our SAED results.

**Table S1.** The experimental Raman results (4.2 GPa, room temperature) and the calculated data (4.3 GPa, 0 K) with corresponding vibrational assignments.  $\nu$ ,  $\gamma$ , and  $\beta$  represent the stretching, out-of-plane bending, and in-plane bending vibration, respectively.

| Experiment ( $\text{cm}^{-1}$ ) | Calculation ( $\text{cm}^{-1}$ ) | Assignments          |
|---------------------------------|----------------------------------|----------------------|
| 391                             | 396                              | $\nu_{\text{C-C}}$   |
| 408                             | 400                              | $\nu_{\text{C-C}}$   |
| 458                             | 457                              | $\beta_{\text{C-C}}$ |
| 639                             | 631                              | $\beta_{\text{C-C}}$ |
| 701                             | 701                              | $\nu_{\text{C-C}}$   |
| 853                             | 855                              | $\beta_{\text{C-C}}$ |
| 1164                            | 1196                             | $\beta_{\text{C-H}}$ |
| 1243                            | 1247                             | $\beta_{\text{C-H}}$ |
| 1259                            | 1261                             | $\nu_{\text{C-F}}$   |

|      |      |             |
|------|------|-------------|
| 1610 | 1611 | $\nu_{C-C}$ |
| 1628 | 1627 | $\nu_{C-C}$ |
| 3114 | 3110 | $\nu_{C-H}$ |
| 3133 | 3112 | $\nu_{C-H}$ |

**Table S2.** The experimental IR results (4.3 GPa, room temperature) and the calculated data (4.3 GPa, 0 K) with the assignments.  $\nu$ ,  $\gamma$ , and  $\beta$  represent the stretching, out-of-plane bending, and in-plane bending vibration, respectively.

| Experiment (cm <sup>-1</sup> ) | Calculation (cm <sup>-1</sup> ) | Assignments    |
|--------------------------------|---------------------------------|----------------|
| 736                            | 736                             | $\beta_{C-C}$  |
| 834                            | 816                             | $\gamma_{C-H}$ |
| 845                            | 822                             | $\gamma_{C-H}$ |
| 948                            | 933                             | $\gamma_{C-H}$ |
| 1012                           | 1001                            | $\beta_{C-C}$  |
| 1085                           | 1053                            | $\beta_{C-H}$  |
| 1183                           | 1191                            | $\beta_{C-C}$  |
| 1203                           | 1193                            | $\nu_{C-F}$    |
| 1418                           | 1411                            | $\nu_{C-C}$    |
| 1494                           | 1492                            | $\nu_{C-C}$    |
| 1508                           | 1497                            | $\nu_{C-C}$    |
| 3077                           | 3086                            | $\nu_{C-H}$    |
| 3100                           | 3106                            | $\nu_{C-H}$    |
| 3136                           | 3108                            | $\nu_{C-H}$    |

**Table S3.** Atomic coordinates of 1,4-DFB at 4.3 GPa. They were obtained by geometry optimization using DFT, based on the structure determined by Rietveld refinement.

| atom | x      | y      | z      |
|------|--------|--------|--------|
| C1   | 0.6702 | 0.6656 | 0.7600 |
| C2   | 0.7396 | 0.4590 | 0.8519 |
| C3   | 0.5643 | 0.2892 | 0.8420 |
| C4   | 0.3282 | 0.3345 | 0.7395 |
| C5   | 0.2588 | 0.5409 | 0.6472 |
| C6   | 0.4342 | 0.7108 | 0.6571 |
| F1   | 0.8403 | 0.8319 | 0.7741 |
| F4   | 0.1580 | 0.1684 | 0.7263 |
| H2   | 0.9275 | 0.4319 | 0.9347 |
| H3   | 0.6117 | 0.1225 | 0.9120 |
| H5   | 0.0709 | 0.5679 | 0.5643 |
| H6   | 0.3871 | 0.8774 | 0.5869 |

**Table S4.** Atomic coordinates of 1,4-DFB at 9.4 GPa. They were obtained by geometry optimization using DFT, based on the structure determined by Rietveld refinement.

| atom | x      | y       | z      |
|------|--------|---------|--------|
| C1   | 1.1725 | 0.5377  | 0.2580 |
| C2   | 1.2444 | 0.3258  | 0.3506 |
| C3   | 1.0663 | 0.1520  | 0.3431 |
| C4   | 0.8253 | 0.2002  | 0.2422 |
| C5   | 0.7535 | 0.4119  | 0.1491 |
| C6   | 0.9317 | 0.5857  | 0.1567 |
| F1   | 1.3463 | 0.7075  | 0.2714 |
| F4   | 0.6513 | 0.0305  | 0.2299 |
| H2   | 1.4362 | 0.2984  | 0.4327 |
| H3   | 1.1160 | -0.0196 | 0.4120 |
| H5   | 0.5618 | 0.4390  | 0.0666 |

---

|    |        |        |        |
|----|--------|--------|--------|
| H6 | 0.8822 | 0.7573 | 0.0879 |
|----|--------|--------|--------|

---

**Table S5.** Atomic coordinates of d<sub>6</sub>-benzene at 9.2 GPa. They were obtained by geometry optimization using DFT, based on the structure determined by Rietveld refinement.

---

| atom | x       | y       | z       |
|------|---------|---------|---------|
| C1   | -0.2754 | -0.0121 | -0.1218 |
| C2   | -0.0907 | -0.2282 | -0.1315 |
| C3   | -0.1902 | 0.2057  | -0.0027 |
| D1   | -0.4822 | -0.0457 | -0.2140 |
| D2   | -0.1321 | -0.3877 | -0.2343 |
| D3   | -0.3504 | 0.3505  | 0.0119  |

---

## References

1. X. Li, M. Baldini, T. Wang, B. Chen, E.S. Xu, B. Vermilyea, V. H. Crespi, R. Hoffmann, J. J. Molaison, C. A. Tulk, M. Guthrie, S. Sinogeikin and J. V. Badding, *J. Am. Chem. Soc.*, 2017, **139**, 16343-16349.
